# Supplementary material for: Telomerase inhibitor imetelstat has preclinical activity across the spectrum of non-small cell lung cancer oncogenotypes in a telomere length dependent manner
Source: PubMed Central journal article supplement (PMC5077965; doi:10.18632/oncotarget.9335), 2016-05-12
Supplement: oncotarget-07-31639-s001.pdf [file oncotarget-07-31639-s001.pdf]

## Telomerase inhibitor imetelstat has preclinical activity across the spectrum of non-small cell lung cancer oncogenotypes in a telomere length dependent manner

### Supplementary Material

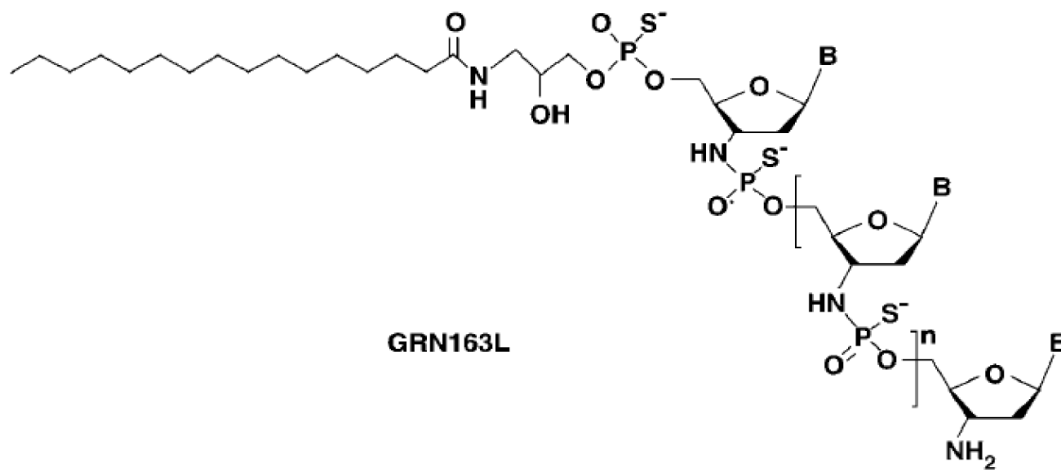

### Supplemental Figure S1. Structure of Imetelstat

First published in Herbert BS, et al. Lipid modification of GRN163, an N3'-->P5' thio-phosphoramidate oligonucleotide, enhances the potency of telomerase inhibition. *Oncogene*. 2005;24:5262-8.

**Supplemental Table S1.**

CFI – Colony Formation Inhibition, CFE – Colony Forming Efficiency, SD – Standard

Deviation, DT – Doubling Time, ADN – adenocarcinoma, HD - Homozygous Deletion, MEC -

Muco-epidermoid carcinoma, LCN – large cell neuroendocrine, ADSQ – adenosquamous, SCC-

squamous cell carcinoma, LCC – large cell, M – mesothelioma, CE - Carcinoid-endocrine, C –

Caucasian, PY – smoking pack year, B – Black, A - Asian, NC –No Colonies Formed, LC – Low

Colony (colony formation efficiency was <1%); Blank cells indicate we do not have the data.

| Cell Line | Tumor Type | Stage | Age | Race | Gender | Smoking (PY) | p53 | KRAS | STK11 | EGFR | Telo Length (kb) | % CFI | SD | % CFE | SD | DT (hr) | SD |
|-----------|------------|-------|-----|------|--------|--------------|-----|------|-------|------|------------------|-------|----|-------|----|---------|----|
| A549      | ADN        |       | 58  | C    | M      |              | WT  | Mut  | Mut   | WT   | 4.7              | 9     | 27 | 81    | 23 | 24      | 3  |
| Calu-1    | MEC        |       | 47  | C    | M      |              | HD  | Mut  | WT    | WT   | 2                | 60    | 17 | 27    | 3  | 50      | 15 |
| Calu-3    | ADN        |       | 25  | C    | M      |              | Mut | WT   | WT    | WT   | 1.5              |       |    | LC    |    | 40      | 6  |
| Calu-6    | ADN        |       | 61  | C    | F      |              | Mut | Mut  | WT    | WT   | 2.1              | 34    | 25 | 6     | 2  | 32      | 5  |
| H23       | ADN        |       | 51  | B    | M      | 40PY         | Mut | Mut  | Mut   | WT   | 2.8              | 59    | 11 | 32    | 6  | 39      | 4  |
| H157      | SCC        | 3B    | 59  | C    | M      | Y            | Mut | Mut  | Mut   | WT   | 4.8              | 30    | 26 | 47    | 14 | 21      | 2  |
| H157-luc  | SCC        | 3B    | 59  | C    | M      | Y            | Mut | Mut  | Mut   | WT   | 15.4             | 14    | 27 |       |    |         |    |
| H226      | S M        |       |     |      | M      |              | Mut | WT   | WT    | WT   | 5.9              | 33    | 23 | 41    | 17 | 52      | 13 |
| H322      | ADN        | 4     | 52  | C    | M      | 60PY         | Mut | WT   | WT    | WT   | 4.3              | 49    | 12 | 60    | 12 | 51      | 7  |
| H358      | ADN        |       |     | C    | M      |              | HD  | Mut  | WT    | WT   | 3.4              | 64    | 17 | 36    | 12 | 38      | 10 |
| H441      | ADN        | 3A    | 33  |      | M      |              | Mut | Mut  | WT    | WT   | 3.2              |       |    | LC    |    | 47      | 8  |
| H460      | LCC        |       |     |      | M      |              | WT  | Mut  | Mut   | WT   | 5                | 3     | 23 | 57    | 23 | 21      | 3  |
| H522      | ADN        | 2     | 60  | C    | M      | 60PY         | Mut | WT   | WT    | WT   | 3                | 28    | 8  | 42    | 2  | 48      | 4  |
| H596      | ADSQ       | 3A    | 73  | C    | M      |              | Mut | WT   | WT    | WT   | 4.3              | 31    | 24 | 36    | 11 | 41      | 8  |
| H650      | ADN        |       |     |      | M      | N            | Mut | Mut  | WT    | WT   | 3.7              | 56    | 4  | 12    | 2  | 49      | 3  |
| H661      | LCC        | 3B    | 43  | C    | M      |              | Mut | WT   | WT    | WT   | 19               | 7     | 18 | 43    | 7  | 33      | 8  |
| H727      | CE         | 3A    | 65  | C    | F      | 60PY         | WT  | Mut  | Mut   | WT   | 3.7              | 34    | 5  | 74    | 15 | 41      | 3  |
| H820      | ADN        | 4     | 53  | C    | M      |              | Mut | WT   | WT    | Mut  | 1.9              | 79    | 4  | 13    | 6  | 65      | 28 |
| H838      | ADN        | 3B    | 59  | C    | M      | 80PY         | Mut | WT   | Mut   | WT   | 6                | 5     | 25 | 82    | 11 | 26      | 2  |
| H920      | ADN        | 4     | 44  | C    | M      | 75PY         | Mut | WT   | WT    | WT   | 2.4              | 66    | 14 | 57    | 14 | 42      | 7  |
| H1155     | LCN        | 3A    | 36  | C    | M      | 20PY         | Mut | Mut  | WT    | WT   | 5                | 35    | 13 | 80    | 19 | 23      | 2  |
| H1299     | LCN        | 3A    | 43  | C    | M      | 50PY         | HD  | WT   | WT    | WT   | 19               | 39    | 8  | 26    | 7  | 23      | 3  |
| H1355     | ADN        | 4     | 53  | C    | M      | 100PY        | Mut | Mut  | Mut   | WT   | 5.3              | 81    | 2  | 66    | 15 | 49      | 21 |
| H1373     | ADN        | 3A    | 56  | B    | M      | 30PY         | Mut | Mut  | WT    | WT   | 3.2              | 92    | 8  | 10    | 3  | 37      | 7  |
| H1395     | ADN        | 2     | 55  | C    | F      | 15PY         | WT  | WT   | Mut   | WT   | 4.3              | 72    | 13 | 14    | 3  | 51      | 9  |
| H1437     | ADN        | 1     | 60  | C    | M      | 70PY         | Mut | WT   | Mut   | WT   | 3                | 14    | 6  | 94    | 10 | 29      | 4  |
| H1568     | ADN        | 4     | 48  | C    | F      | 60PY         | Mut | WT   | HD    | WT   | 9                | -22   | 22 | 23    | 3  | 43      | 10 |
| H1648     | ADN        | 3A    | 39  | B    | M      | 40PY         | Mut | WT   | WT    | WT   | 2                | 80    | 12 | 6     | 4  | 42      | 10 |
| H1650     | ADN        | 3B    | 27  | C    | M      | 10PY         | Mut | WT   | WT    | Mut  | 2.7              | 58    | 6  | 26    | 2  | 40      | 4  |
| H1666     | ADN        | 3     | 50  | C    | F      |              | WT  | WT   | WT    | WT   | 3.9              | 79    | 20 | 5     | 2  | 45      | 11 |
| H1693     | ADN        | 3B    | 55  | C    | F      | 80PY         | Mut | WT   | WT    | WT   | 6.2              | 58    | 23 | 22    | 4  | 51      | 18 |
| H1703     | ADSQ       | 1     | 56  | C    | M      | 50PY         | Mut | WT   | WT    | WT   | 20               | -84   | 90 | 17    | 11 | 48      | 14 |
| H1792     | ADN        | 4     | 50  | C    | M      | 30PY         | Mut | Mut  | WT    | WT   | 4                | 9     | 16 | 61    | 8  | 33      | 3  |
| H1819     | ADN        | 3     | 55  | C    | F      | 80PY         | Mut | WT   | WT    | WT   | 8                | 48    | 6  | 35    | 22 | 51      | 13 |
| H1838     | ADN        |       |     |      | F      |              | Mut | WT   | WT    | WT   | 3                | 13    | 33 | 2     | 1  | 72      | 9  |
| H1944     | ADN        | 3B    | 62  | C    | F      | 40PY         | WT  | Mut  | Mut   | WT   | 2                | 41    | 11 | 76    | 13 | 38      | 7  |
| H1975     | ADN        |       |     |      | F      | N            | WT  | WT   | WT    | Mut  | 13               | 36    | 5  | 32    | 5  | 42      | 8  |
| H1993     | ADN        | 3A    | 47  | C    | F      | 30PY         | Mut | WT   | Mut   | WT   | 10               | 18    | 8  | 72    | 12 | 32      | 6  |
| H2009     | ADN        | 4     | 68  | C    | F      | 30PY         | Mut | Mut  | WT    | WT   | 7                | 37    | 22 | 35    | 8  | 30      | 8  |
| H2073     | ADN        | 3A    | 47  | C    | F      | 30PY         | Mut | WT   | Mut   | WT   | 3                | 72    | 14 | 42    | 6  | 45      | 7  |
| H2087     | ADN        | 1     | 69  | C    | M      | 60PY         | Mut | WT   | WT    | WT   | 3                | 93    | 5  | 32    | 16 | 51      | 5  |
| H2122     | ADN        | 4     | 46  | C    | F      | 30PY         | Mut | Mut  | Mut   | WT   | 3.9              | 36    | 20 | 44    | 10 | 32      | 8  |
| H2126     | ADN        | 3B    | 65  | C    | M      |              | Mut | WT   | Mut   | WT   | 5.5              | 20    | 9  | 38    | 6  | 41      | 10 |
| H2228     | ADN        |       |     |      | F      | N            | Mut | WT   | WT    | WT   | 3.4              | 32    | 29 | 62    | 13 |         |    |
| H2291     | ADN        |       |     |      | M      | N            | Mut | Mut  | WT    | WT   | 3.3              | 79    | 5  | 23    | 7  |         |    |
| H2347     | ADN        | 1     | 54  | C    | F      |              | WT  | WT   | WT    | WT   | 5.4              | 52    | 5  | 38    | 10 | 39      | 7  |
| H2882     | NSCLC      | 4     | 61  |      | F      |              | Mut | WT   | WT    | WT   | 8                | 73    | 25 | 19    | 10 | 35      | 6  |
| H2887     | NSCLC      | 4     | 31  |      | M      |              | Mut | Mut  | WT    | WT   | 2                | 0     | 7  | 77    | 7  | 43      | 8  |
| H3122     | NSCLC      |       |     |      | M      |              | Mut | WT   | WT    | WT   | 4                | -31   | 31 | 7     | 3  | 48      | 9  |
| H3255     | ADN        | 3B    | 47  | C    | F      | N            | Mut | WT   | WT    | Mut  | 3.3              |       |    | NC    |    |         |    |
| HCC44     | ADN        |       | 54  | C    | F      |              | Mut | Mut  | Mut   | WT   | 3                | 96    | 3  | 7     | 1  | 37      | 3  |
| HCC78     | ADN        |       | 55  | C    | M      |              | Mut | WT   | WT    | WT   | 3.6              | 23    | 14 | 35    | 10 | 39      | 7  |
| HCC95     | SCC        | 4     | 65  | C    | M      |              | Mut | WT   | WT    | WT   | 3                | 80    | 10 | 12    | 5  | 41      | 3  |
| HCC193    | ADN        | 4     | 71  | C    | F      |              | Mut | WT   | WT    | WT   | 2.5              | 41    | 23 | 7     | 3  | 45      | 13 |
| HCC515    | ADN        | 3B    | 39  | C    | F      |              | Mut | Mut  | Mut   | WT   | 2                | 34    | 4  | 49    | 8  | 39      | 3  |
| HCC827    | ADN        |       | 38  | C    | F      |              | Mut | WT   | WT    | Mut  | 3                | 29    | 6  | 16    | 8  | 44      | 13 |
| HCC1359   | LCC        | 4     | 55  | B    | F      | 37PY         | Mut | WT   | WT    | WT   | 8.5              |       |    | NC    |    | 63      | 2  |
| HCC1438   | LCC        | 1A    | 43  | B    | M      | N            | WT  | WT   | WT    | WT   | 3                | 59    | 4  | 19    | 4  | 37      | 4  |
| HCC1833   | ADN        | 1B    | 69  | C    | F      | 30PY         | WT  | WT   | Mut   | WT   | 2.4              | 44    | 18 | 76    | 23 | 47      | 3  |
| HCC2279   | ADN        | 2B    | 52  | A    | F      | 40PY         | Mut | WT   | WT    | Mut  | 2.8              | 79    | 6  | 9     | 2  | 49      | 8  |
| HCC2429   | NSCLC      |       |     |      | F      |              | Mut | WT   | WT    | WT   | 4.7              | 63    | 8  | 116   | 15 |         |    |
| HCC4006   | ADN        |       |     | C    | M      | N            | Mut | WT   | WT    | Mut  | 13               | 65    | 15 | 23    | 2  | 47      | 5  |
| HCC4019   | ADN        | 4     | 40  | C    | M      | 50PY         | Mut | Mut  | WT    | WT   | 2.8              | 51    | 20 | 21    | 3  | 61      | 7  |
| HOP62     | ADN        |       |     |      | F      |              | Mut | Mut  |       | WT   | 5                | 36    | 12 | 15    | 3  | 30      | 7  |

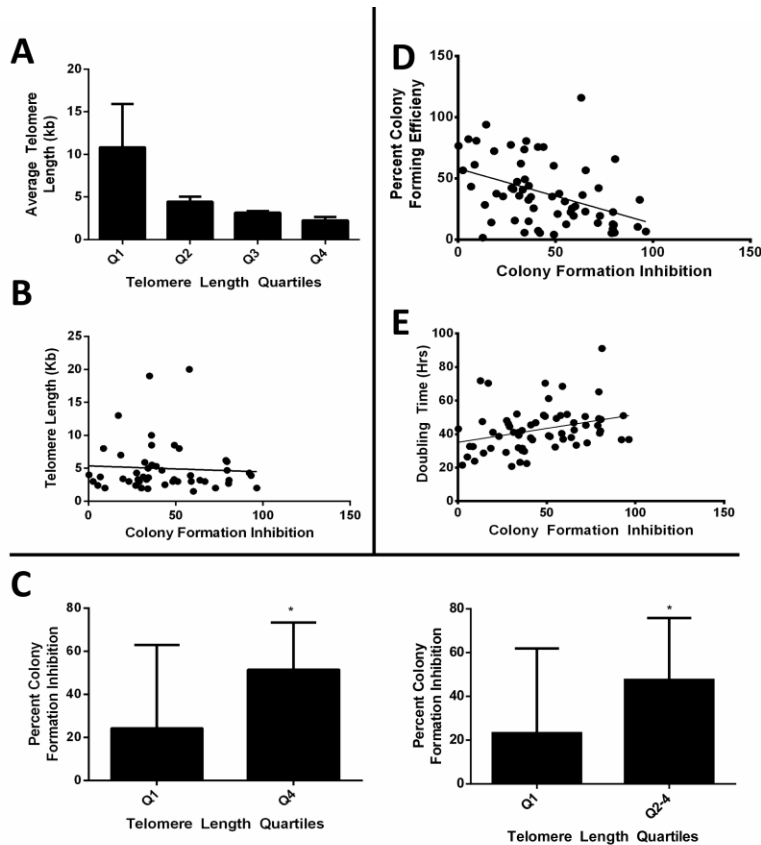

## Supplemental Figure S2. Telomere Length Quartiles and Colony Formation Inhibition Correlations

(A) NSCLC panel divided into quartiles based on telomere length. Average telomere length of each quartile: Q1 – 10.8 kb, Q2 – 4.5 kb, Q3 – 3.2 kb, Q4 – 2.3 kb. (B) Correlation between telomere length and colony formation inhibition of the panel ( $r^2 = 0.003$ ) (C) Q4 (shortest telomeres) is more sensitive to imetelstat in colony formation than Q1 (longest telomeres) ( $p > 0.03$ ) and combination of Q2, Q3, and Q4 is more sensitive to imetelstat colony formation than Q1 ( $p > 0.01$ ). (D) Correlation between colony forming efficiency and colony formation inhibition of the panel ( $r^2 = 0.18$ ) (E) Correlation between doubling time of the cell line and colony formation inhibition of the panel ( $r^2 = 0.12$ ).

**Supplemental Table S2. Correlation of Imetelstat Colony Formation Inhibition to IC50s of Other Therapies**

IC50s for each cell line from 26 different therapies were correlated to imetelstat colony formation reduction with imetelstat. The  $r^2$  value is listed for each therapy comparing IC50s versus imetelstat colony formation inhibition across the panel.

| <b>Drug</b>            | <b>r<sup>2</sup> value</b> |
|------------------------|----------------------------|
| AZD6244                | 0.020                      |
| Carboplatin            | 0.018                      |
| Cetuximab              | 0.011                      |
| Chloroquine            | 0.002                      |
| Cisplatin              | 0.016                      |
| Cyclopamine            | 0.025                      |
| Docetaxel              | 0.018                      |
| Doxorubicin            | 0.014                      |
| Etoposide              | 0.023                      |
| Gefitinib              | 0.098                      |
| Gemcitabine            | 0.004                      |
| Gemcitabine/Cisplatin  | 0.016                      |
| Irinotecan             | 0.077                      |
| Lapatinib              | 0.148                      |
| MK-2206                | 0.000                      |
| Nintedanib             | 0.001                      |
| Olaparib               | 0.000                      |
| Paclitaxel             | 0.006                      |
| Paclitaxel/Carboplatin | 0.001                      |
| PD173074               | 0.170                      |
| Pemetrexed             | 0.006                      |
| Pemetrexed/Cisplatin   | 0.010                      |
| PF2341066              | 0.078                      |
| Rapamycin              | 0.003                      |
| Smac Mimetic           | 0.016                      |
| Sorafenib              | 0.043                      |
| Erlotinib              | 0.134                      |
| Vinorelbine            | 0.018                      |

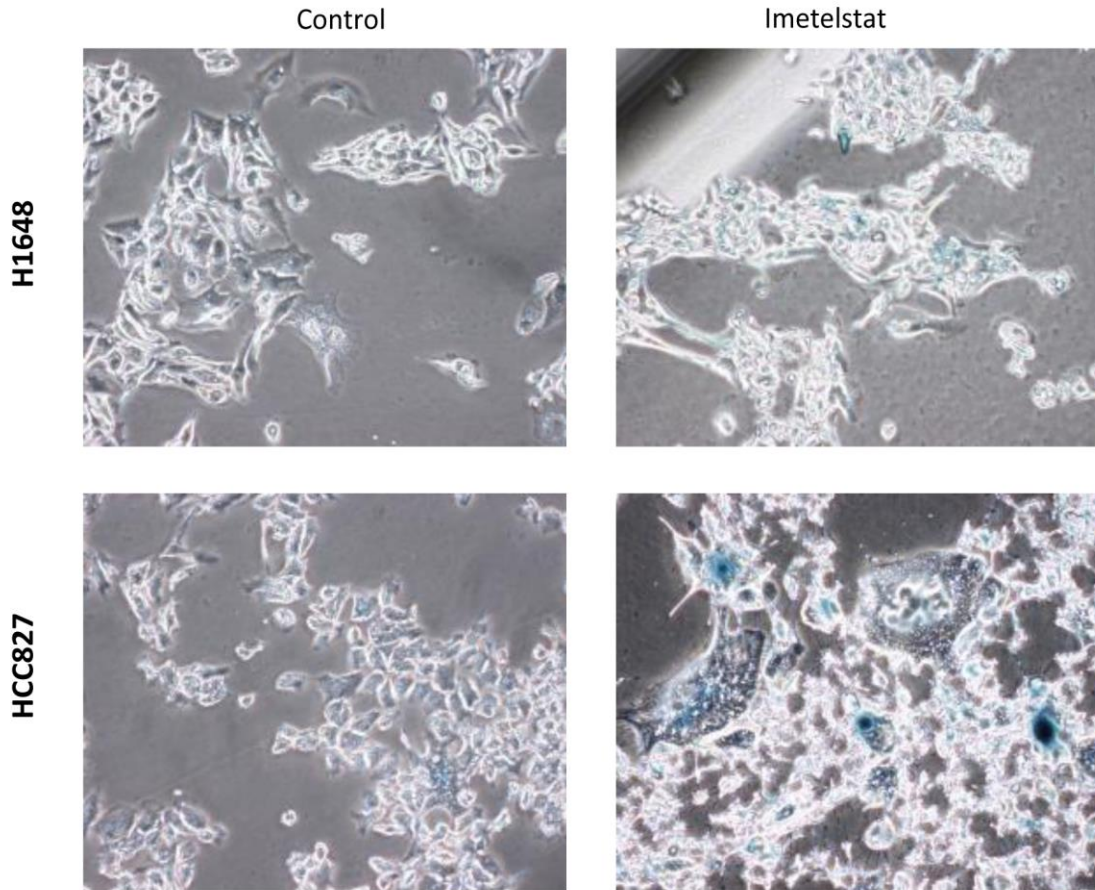

**Supplemental Figure S3. Senescence Associated  $\beta$ -galactosidase Staining of Long-term Imetelstat Treated Cells**

Senescence associated  $\beta$ -galactosidase staining for control and imetelstat treated H1648 cells at 110 days of treatment and HCC827 cells at 130 days of treatment.

### Supplemental Table S3.

NSCLCs were treated long-term with 1  $\mu\text{M}$  imetelstat and drug response phenotypes to a variety of chemotherapy and targeted therapy agents were determined using a 96-well MTS cell viability assay. Drugs were tested at 8 different drug concentrations each in octuplicate and assays were repeated three times. IC50s are displayed in the table below. Imetelstat treatment occasionally increases the response to cytotoxic chemotherapy, but this is highly heterogeneous between tumors.

| Cell Line   | Carboplatin ( $\mu\text{M}$ ) | Doxorubicin (nM) | Gemcitabine (nM) | Paclitaxel (nM) | Paclitaxel+ Carboplatin (nM) | Erlotinib ( $\mu\text{M}$ ) | Vinorelbine (nM) |
|-------------|-------------------------------|------------------|------------------|-----------------|------------------------------|-----------------------------|------------------|
| H157 0wks   | 45                            | 26.5             | 3.6              | 0.41            | 0.385                        | 24.5                        | 0.235            |
| H157 8wks   | 36.5                          | 23               | 3.04             | 0.37            | 1.3                          | 16                          | 0.16             |
| H157 16wks  | 56.5                          | 27.5             | 5.25             | 0.22            | 0.185                        | 13.5                        | 0.025            |
| H1648 0wks  | 49.5                          | 255              | 27               | 5.25            | 4.25                         | 10                          | 1.95             |
| H1648 6wks  | 40.5                          | 145              | 22               | 1.3             | 1.9                          | 3.05                        | 0.018            |
| H1819 0wks  | 170                           | 92.5             | 1.4              | 1.95            | 5.4                          | 0.375                       | 0.036            |
| H1819 8wks  | 125                           | 220              | 2.4              | 1.36            | 1.98                         | 4.85                        | 0.014            |
| H1819 16wks | 120                           | 160              | 7.55             | 0.45            | 0.27                         | 1.12                        | 0.037            |
| H2087 0wks  | 5.05                          | 37               | 2.75             | 0.37            | 0.29                         | 2.3                         | 0.125            |
| H2087 16wks | 4.8                           | 40               | 2.95             | 0.37            | 0.27                         | 7.1                         | 0.435            |
| H358 0wks   | 33.5                          | 100              | 3.2              | 1.2             | 3.7                          | 3.55                        | 5.9              |
| H358 6wks   | 15.5                          | 8.5              | 1.5              | 0.635           | 0.985                        | 0.66                        | 0.032            |

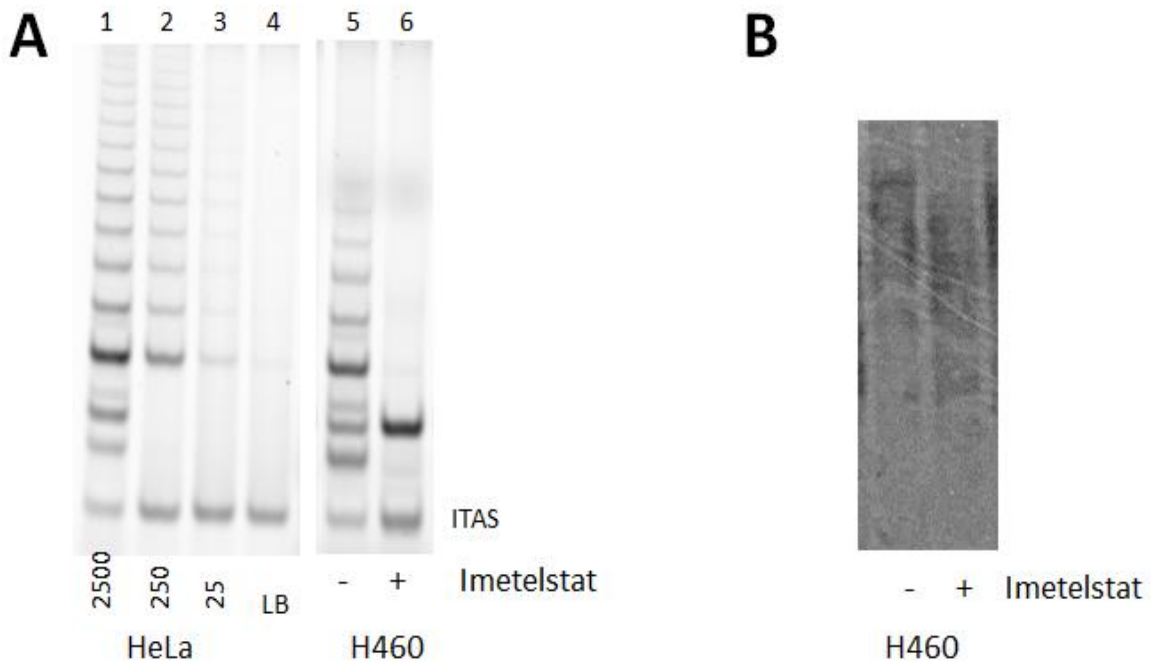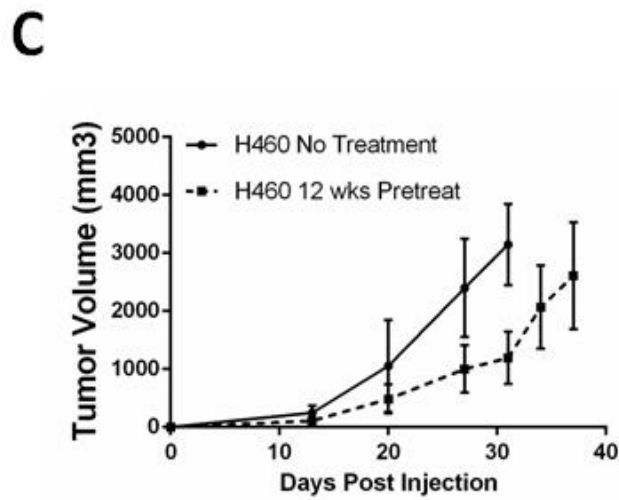

**Supplemental Figure S4. Imetelstat Therapy in vivo Response is Dependent on Initial Telomere Length and Therapy Duration.**

(A) TRAP assay comparing telomerase activity of H460 tumors without (lane 5) and with (lane 6) imetelstat treatment. Control lanes 1-4, 2500, 250, 25 HeLa cells and lysis buffer



(LB). ITAS, Internal Telomerase Assay Standard. (B) TRF of tumors from mice receiving saline (left column) or 30 mg/kg imetelstat (right column) showing a decrease in telomere length with imetelstat treatment. (C) Xenograft tumor growth curves of parental H460 or H460 cells pretreated with imetelstat for 12 weeks *in vitro* before tumor cell injection. No treatment was given during xenograft growth.

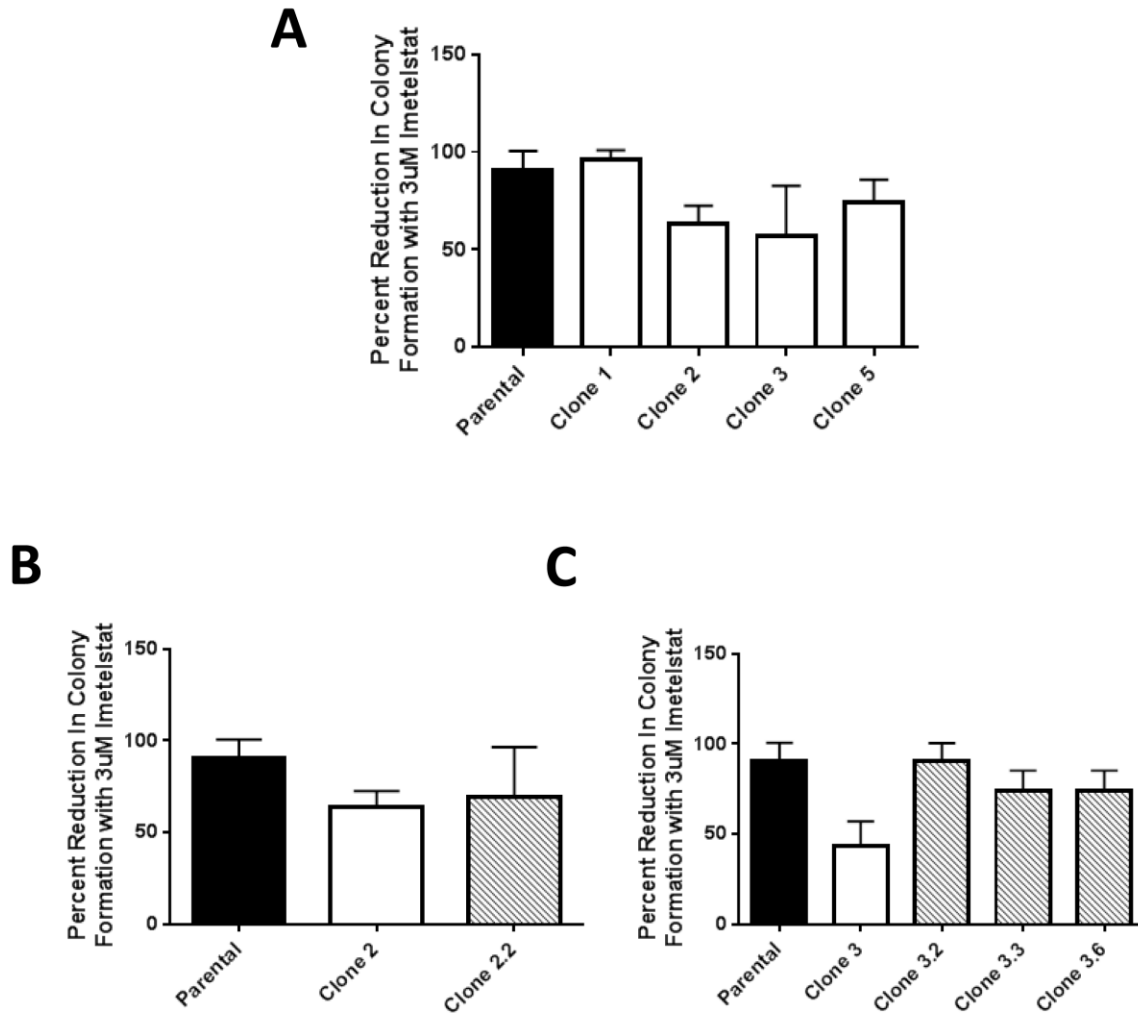

**Supplemental Figure S5. Serial Cloning of H1648 in the Presence of Imetelstat.**

(A) H1648 reduction in colony formation of parental line (black) or clones of H1648 (white) selected in the presence of 3  $\mu$ M imetelstat. (B) Percent reduction in colony forming ability of parental (black), Clone 2 (white) and Clone 2.2 (striped), a subclone of Clone 2. (C) Percent reduction in colony forming ability of H1648 parental (black), Clone 3 (white) and Clone 3 subclones 3.2, 3.3, and 3.6 (striped).

## **Supplemental Methods**

### *5-day Cell Viability Assay*

2000 cells per well were plated in 96-well plate format. Drugs were added in 4-fold dilutions with a maximum dose of 1000 nM for paclitaxel (Bristol-Myers Squibb) and vinorelbine (Pierre Fabre Company), 2000 nM for doxorubicin (Teva Parenteral) and gemcitabine (Eli Lilly and Company), 42.5  $\mu$ M for imetelstat (Geron Corp), 808  $\mu$ M for carboplatin (Teva Parenteral), and 100  $\mu$ M for cisplatin (Teva Parenteral) and erlotinib (OSI Pharmaceuticals).

Paclitaxel/carboplatin combination was given in a 2:3 wt/wt ratio. Each drug was given at 8 drug concentrations per assay. Plates were incubated for four days and relative cell number was determined by incubating for 1 to 3 hours at 37°C in the presence of MTS (Promega, Madison, WI), final concentration 333  $\mu$ g/ml. Absorbance readings of the plate were obtained at 490 nm using a Spectra Max 190 (Molecular Devices). Each plate contained eight replicates per concentration and was repeated at least 4 times. Drug sensitivity curves and IC50s were calculated using in-house software, DIVISA.

### *Serial Cloning*

1000 H1648 cells were plated in a 10cm dish in the presence of 3  $\mu$ M imetelstat. 8 mm cloning cylinders lined with silicone grease were placed over surviving clones. 10  $\mu$ L trypsin were added to the center of the ring and 50  $\mu$ L of RPMI +5% FBS media was used to harvest the cells and transfer to a new dish. These cells were allowed to proliferate and then used in the standard colony formation already described in the materials and methods. The colony formation assay was repeated a minimum of two times with each replicate done in triplicate. Subclones of these clones were then performed using this same protocol.
